# Supplementary material
Source: publisher site journal article supplement (https://www.dovepress.com/article/441235)
Supplement: Supplementary file 1 [file get_supplementary_file.php]

**Supplementary Material 1. Formula of the Saga Fall Risk Model 2.1**

**Formula of model 2.1 (SFRM2.1)**

−5.6535 + 0.0208 × (Age) + (Men = 0.2521) + (Emergency admission = 0.1830) + (Admitted department; Neurosurgery = 0.1605) + (Hypnotics; Using = 0.4098, Missing data = −0.8069) + (History of fall = 0.7598) + (Ability of eating; Independent = −0.4743, Missing data = 0.0745) + (Bedriddenness rank; J = −0.0725, A = 0.7627, B = 0.9864, C = 0.3321).

**Predictive occurrence of fall during the administration (%)**

100 × exp(Score)/{1 + exp(Score)}.

**Table S1. Characteristics of each hospital**

|  | Location | Setting | Hospital beds (beds) | Long term care beds (beds) | Psychiatric beds (beds) | Tuberculosis beds (beds) | Number of departments | Annual emergency transports | Mean length of hospital stay (days) | Number of available patients | Fall rate (%) |
| --- | --- | --- | --- | --- | --- | --- | --- | --- | --- | --- | --- |
| Site 1 | Saga city, Saga | tertiary | 604 | NA | 24 | NA | 31 | 2471 | 11.9 | 28,514 | 1.8 |
| Site 2 | Shizuoka city, Shizuoka | tertiary | 712 | NA | NA | 50 | 31 | 5,094 | 11.2 | 41,416 | 2.7 |
| Site 3 | Ureshino city, Saga | tertiary | 399 | NA | NA | NA | 24 | 2,376 | 13 | 14,362 | 3.3 |
| Site 4 | Saga city, Saga | tertiary | 450 | NA | NA | NA | 35 | 2,764 | 10.4 | 30,677 | 1.6 |
| Site 5 | Karatsu city, Saga | chronic | 56 | 56 | NA | NA | 5 | 51 | 88.2 | 661 | 19.5 |
| Site 6 | Isumi city, Chiba | chronic | 144 | 48 | 4 | NA | 14 | 1,700 | 17 | 395 | 0.5 |
| Site 7 | Saga city, Saga | chronic | 84 | 84 | NA | NA | 3 | 0 | 613 | 126 | 7.9 |
| Site 8 | Kashima city, Saga | acute | 111 | NA | NA | NA | 10 | 729 | 12.6 | 8,370 | 3.1 |

NA: not applicable

**Table S2. Characteristics of the patients of the test and validation sets**

| Variable, Category | Test set | | Validation set | |
| --- | --- | --- | --- | --- |
| Fall Group | Non-Fall Group | Fall Group | Non-Fall Group |
| n = 1,944 | n = 79,846 | n = 1,042 | n = 41,689 |
| Age, years | 77 (69-85) | 70 (59-79) | 78 (69-85) | 70 (59-79) |
| Sex, Men | 1,114 (57.3) | 42,520 (53.3) | 610 (58.5) | 22,039 (52.9) |
| Emergency admission, Yes | 1,094 (56.3) | 30,180 (37.8) | 617 (59.2) | 15,734 (37.7) |
| Transported by ambulance,a Yes | 378 (19.4) | 9,961 (12.5) | 215 (20.6) | 5,151 (12.4) |
| Referral letter,b Presence | 949 (78.2) | 42,136 (78.9) | 532 (81.1) | 21,955 (78.9) |
| Department, Internal Medicine | 1,091 (56.1) | 37,921 (47.5) | 566 (54.3) | 19,725 (47.3) |
| Department, Neurosurgery | 92 (4.7) | 2,592 (3.2) | 59 (5.7) | 1,448 (3.5) |
| Hypnotic medications, Using | 351 (18.1) | 9,410 (11.8) | 185 (17.8) | 4,829 (11.6) |
| Hypnotic medications, Missing | 11 (0.6) | 1,666 (2.1) | 10 (1.0) | 809 (1.9) |
| Post-stroke sequelae,c Presence | 284 (14.6) | 6,691 (8.4) | 145 (13.9) | 3,652 (8.8) |
| Use of mobility aids,d Yes | 369 (54.1) | 6,526 (20.8) | 184 (50.5) | 3,419 (20.9) |
| Parkinson's syndrome, e Presence | 45 (2.3) | 866 (1.1) | 28 (2.7) | 454 (1.1) |
| History of falls, Presence | 440 (22.6) | 6,006 (7.5) | 232 (22.3) | 3,086 (7.4) |
| Visual impairment, f Presence | 187 (20.8) | 5,809 (17.3) | 117 (24.3) | 3,061 (17.6) |
| Eating, Independent | 1,117 (57.5) | 64,127 (80.3) | 591 (56.7) | 33,390 (80.1) |
| Eating, Requiring assistance | 806 (41.5) | 15,282 (19.1) | 443 (42.5) | 8,064 (19.3) |
| Eating, Missing category | 21 (1.1) | 437 (0.5) | 8 (0.8) | 235 (0.6) |
| Bedriddenness rank, Normal | 31 (1.6) | 3,245 (4.1) | 11 (1.1) | 1,624 (3.9) |
| Bedriddenness rank, J | 420 (21.6) | 37,870 (47.4) | 213 (20.4) | 19,840 (47.6) |
| Bedriddenness rank, A | 520 (26.7) | 15,337 (19.2) | 282 (27.1) | 7,892 (18.9) |
| Bedriddenness rank, B | 454 (23.4) | 8,081 (10.1) | 256 (24.6) | 4,235 (10.2) |
| Bedriddenness rank, C | 519 (26.7) | 15,313 (19.2) | 280 (26.9) | 8,098 (19.4) |
| Cognitive function score, g Normal | 1,229 (66.0) | 59,521 (85.9) | 676 (67.7) | 31,024 (85.8) |
| Cognitive function score, g I | 196 (10.5) | 3,722 (5.4) | 96 (9.6) | 1,966 (5.4) |
| Cognitive function score, g II | 159 (8.5) | 2,169 (3.1) | 76 (7.6) | 1,160 (3.2) |
| Cognitive function score, g III | 210 (11.3) | 2,635 (3.8) | 114 (11.4) | 1,413 (3.9) |
| Cognitive function score, g IV | 57 (3.1) | 1,018 (1.5) | 26 (2.6) | 524 (1.4) |
| Cognitive function score, g M | 11 (0.6) | 190 (0.3) | 10 (1.0) | 88 (0.2) |
| Surgery operation, h Undergone | 442 (22.7) | 22,487 (28.2) | 229 (22.0) | 11,850 (28.4) |
| Rehabilitation, i Undergone | 1,256 (64.6) | 21,465 (26.9) | 653 (62.7) | 11,285 (27.1) |
| Length of hospital stay j (days) | 26 (15-45) | 9 (4-16) | 27 (15-47) | 9 (4-16) |

a test set n = 81,785, Validation set n = 42,729

b test set n = 54,624, Validation set n = 28,481

c test set n = 81,782, Validation set n = 42,719

d test set n = 32,024, Validation set n = 16,685

e test set n = 81,782, Validation set n = 42,719

f test set n = 34,410, Validation set n = 17,919

g test set n = 71,117, Validation set n =37,173

h test set n = 81,775, Validation set n = 42,723

i test set n = 81,787, Validation set n =42,731

j test set n = 81,750, Validation set n = 42,716

Continuous and categorical variables are shown as median value (interquartile range) and number (percent).

Bedriddenness ranks: J, independence/autonomy; A, house-bound; B, chair-bound; C, bed-bound. Cognitive function scores: I, almost independent in daily living with only slight cognitive impairment; II, independent with slight difficulty in daily living or communication under careful overseeing; III, dependent in daily living or communication; IV, dependent in daily living or communication, and requires constant care; M, severe psychological symptoms, troubled behaviors or severe physical disorders requiring specialized medical service.
